# Supplementary material for: Small RNA GcvB Regulates Oxidative Stress Response of Escherichia coli
Source: MDPI journal article supplement (doi:10.3390/antiox10111774), 2021-11-05
Supplement: s1 [file s1]

# Supplementary information

**Table S1. Strains used in this work**

| Strain  | Genotype                                                    | Description                                                                                           |
|---------|-------------------------------------------------------------|-------------------------------------------------------------------------------------------------------|
| NCM3722 | wild-type <i>E. coli</i> K-12 strain                        | wild-type <i>E. coli</i> K12 strain                                                                   |
| CY325   | $\Delta gcvB$                                               | <i>gcvB</i> deletion in NCM3722                                                                       |
| CY713   | wild-type <i>E. coli</i> K-12 strain                        | repaired NCM3722 with wild-type <i>fliC</i>                                                           |
| CY1027  | $\Delta gcvB::cat$                                          | <i>gcvB</i> deletion in CY713                                                                         |
| CY1038  | $\Delta oxyR::cat$                                          | <i>oxyR</i> deletion in CY713                                                                         |
| CY454   | <i>oxyR-myc-stop codon-kan</i>                              | <i>oxyR-myc</i> constructed in NCM3722                                                                |
| CY455   | <i>oxyR-myc-stop codon-kan</i> $\Delta gcvB$                | <i>oxyR-myc</i> constructed in CY325                                                                  |
| CY1042  | $\Delta gcvB oxyR::cat$                                     | <i>oxyR</i> and <i>gcvB</i> double deletion strain                                                    |
| CY1037  | <i>kan::P1oxyR-lacZ</i> $\Delta oxyR::cat$                  | P1 <i>oxyR-lacZ</i> translational fusion constructed in the <i>gcvB</i> wild-type background CY1057   |
| CY1041  | <i>kan::P1oxyR-lacZ</i> $\Delta oxyR::cat$<br>$\Delta gcvB$ | P1 <i>oxyR-lacZ</i> translational fusion constructed in the <i>gcvB</i> knockout background CY1042    |
| CY1047  | <i>kan::P3oxyR-lacZ</i> $\Delta gcvB$<br>$\Delta oxyR::cat$ | P3 <i>oxyR-lacZ</i> transcriptional fusion constructed in the <i>gcvB</i> knockout background CY1042  |
| CY1052  | <i>kan::P3oxyR-lacZ</i> $\Delta oxyR::cat$                  | P3 <i>oxyR-lacZ</i> transcriptional fusion constructed in the <i>gcvB</i> wild-type background CY1057 |
| CY1057  | $\Delta oxyR::cat$                                          | <i>oxyR</i> deletion in NCM3722 background                                                            |
| CY1059  | <i>kan::P2oxyR-lacZ</i> $\Delta oxyR::cat$                  | P2 <i>oxyR-lacZ</i> translational fusion constructed in the <i>gcvB</i> wild-type background CY1057   |
| CY1060  | <i>kan::P2oxyR-lacZ</i> $\Delta oxyR::cat$<br>$\Delta gcvB$ | P2 <i>oxyR-lacZ</i> translational fusion constructed in <i>gcvB</i> knockout background CY1042        |

**Table S2. Primers used for RT-qPCR**

| Primers        | Sequences             |
|----------------|-----------------------|
| <i>flu</i> -F  | AACCGGGACAGTGATGAGAG  |
| <i>flu</i> -R  | AGACGGACGCTGTTGTTTTTC |
| <i>yeeR</i> -F | TCATGAAACTGCCGGAAACC  |
| <i>yeeR</i> -R | GGATTTCTGTTCCGCTGACC  |
| <i>oxyR</i> -F | CTGATGCTGGAAGATGGTCA  |
| <i>oxyR</i> -R | AGCGCTGGCAGTAAAGTGAT  |
| <i>recA</i> -F | GTGCGTTTATCGATGCTGAAC |
| <i>recA</i> -R | CACAGATTTCCAGTGCCTGCT |

**Table S3. DEGs identified between the *gcvB* knockout and wild-type strains.**

| ID            | Symbol      | EXP <sub>WT</sub> | EXP <sub>CY325</sub> | Log2(FC) | <i>q</i> -value (FDR) |
|---------------|-------------|-------------------|----------------------|----------|-----------------------|
| AA953_RS06745 | <i>fhuC</i> | 329.9075          | 142.12               | -1.23433 | 7.49E-08              |
| AA953_RS06750 | <i>fhuD</i> | 304.025           | 134.6325             | -1.2105  | 1.04E-07              |
| AA953_RS06755 | <i>fhuB</i> | 156.0425          | 77.0725              | -1.05673 | 0.000417              |
| AA953_RS16720 | <i>flu</i>  | 44.44             | 2769.188             | 5.985994 | 2.09E-46              |
| AA953_RS16725 | <i>yeeR</i> | 23.0725           | 104.1275             | 2.201021 | 7.12E-06              |

DEGs: differentially expressed genes  
EXP<sub>WT</sub> and EXP<sub>CY325</sub> respectively indicate gene expression (FPKM) in wild-type NCM3722 and the *gcvB* deletion strain CY325.  
FC: Fold change.

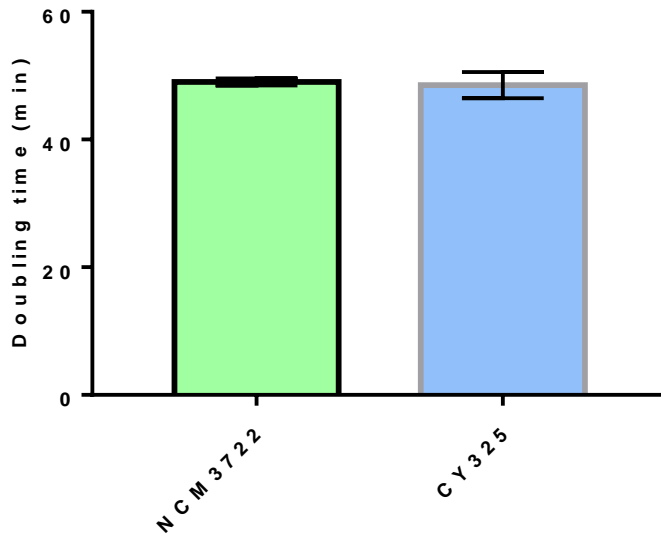

**Figure S1. Doubling time of NCM3722 (WT) and CY325 ( $\Delta gcvB$ ) grown in glucose minimal medium.**

Doubling time of each strain is expressed as average  $\pm$  S.D. of three independent cultures.

(A)

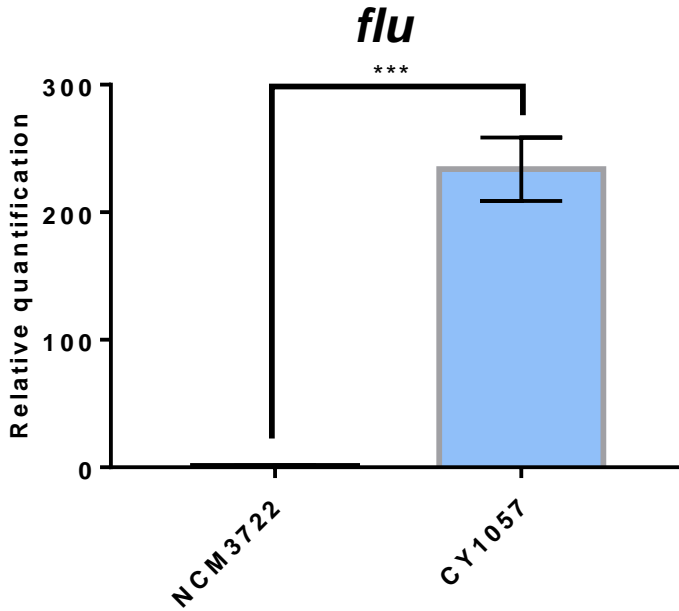

(B)

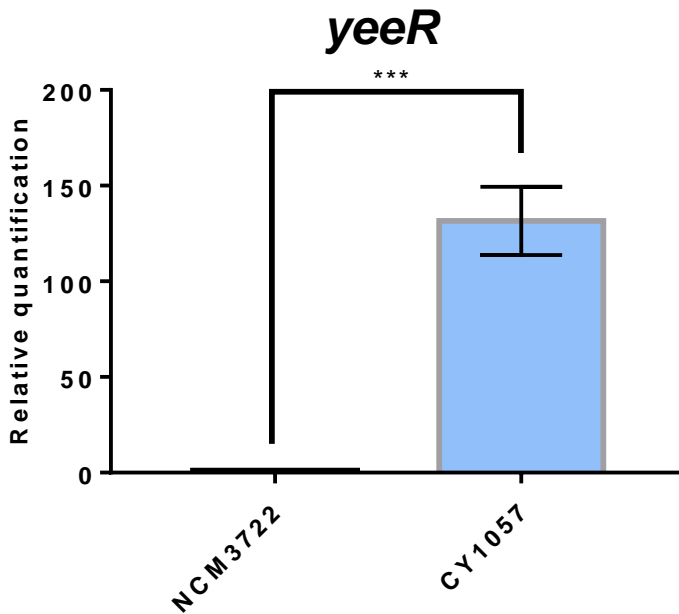

**Figure S2. Gene expression of *flu* and *yeeR* in the *oxyR* wild-type and knockout strains.**  
**A-B.** Gene expression of *flu* and *yeeR* detected by RT-qPCR in the *oxyR* knockout strain CY1057 and in the wild-type strain NCM3722 grown in glucose minimal medium. The mRNA level of each gene in NCM3722 was normalized to 1 and that in CY1057 was determined relative to this value. The relative expression was shown as the average  $\pm$  S.D. of three independent experiments. \*\*\* $P < 0.001$  by student t-test.

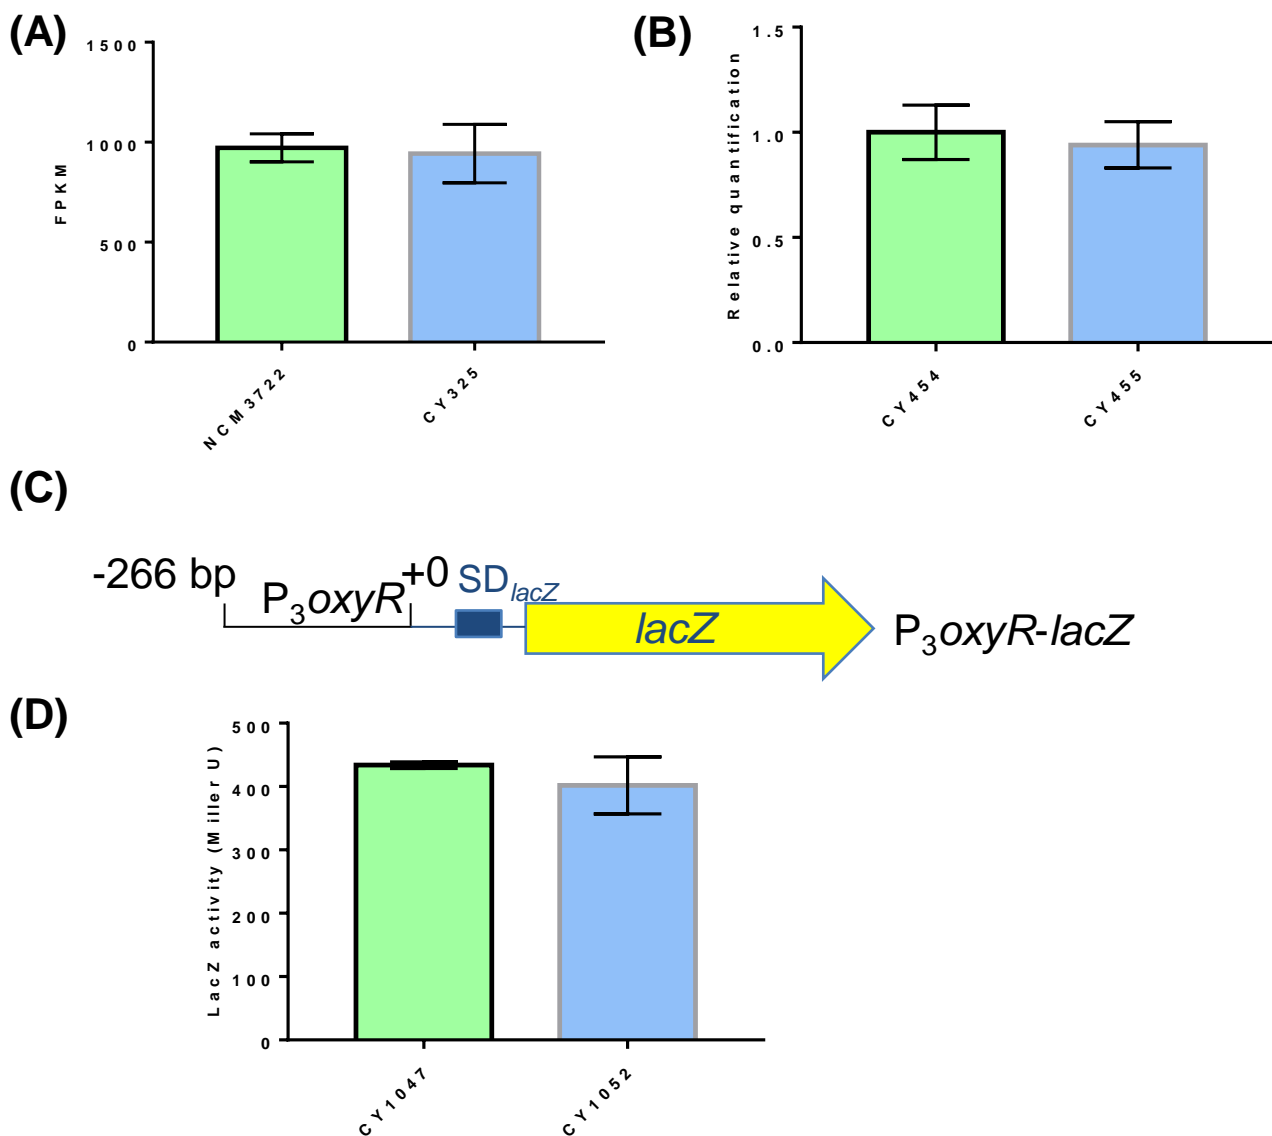

**Figure S3. Transcriptional expression of *oxyR*.**

**A.** The FPKM values of *oxyR* expression in the wild-type strain NCM3722 and in the *gcvB* knockout strain CY325 obtained by RNAseq. The FPKM values are shown as the average  $\pm$  S.D. of two RNAseq assays. **B.** Gene expression of *oxyR* detected by RT-qPCR in the *gcvB* knockout (CY455) and wild-type (CY454) strains grown in glucose minimal medium. The mRNA level of each gene in CY454 was normalized to 1 and that in CY455 was determined relative to this value. The relative expression was shown as the average  $\pm$  S.D. of three independent experiments. **C.** Composition diagram of the promoter of *oxyR* with *lacZ* transcriptional fusion.  $P_3oxyR$  covers the DNA region from -266 bp to 0 bp relative to *oxyR* translational start point.  $SD_{lacZ}$  indicates the ribosome binding site of *lacZ*. Yellow arrow indicates the entire coding region of *lacZ*. **D.**  $\beta$ -galactosidase activities of  $P_3oxyR-lacZ$  fusion in the *gcvB* wild-type (CY1052) and knockout strains (CY1047). The LacZ activity was shown as the average  $\pm$  S.D. of three independent experiments.
